# Supplementary material for: 1-Nitronyl nitroxide pyrene as a new off–on fluorescent chemosensor for Cu2+
Source: Royal Society of Chemistry journal article supplement (doi:10.1039/c4nj00012a), 2014-01-01
Supplement: c4nj00012a.pdf [file c4nj00012a.pdf]

Electronic Supplementary Material (ESI) for New Journal of Chemistry

## Supporting Information

### 1- Nitronyl nitroxide pyrene as a new off-on fluorescent chemosensor for Cu<sup>2+</sup>

Huifei Han,<sup>a</sup> Mian Wang<sup>a</sup> and Hongmei Wang<sup>\*a</sup>

<sup>a</sup> *Department of Chemistry, China Agricultural University, Beijing 100193, P.R. China*

#### Table of contents

| page | Contents                                                                                                                                                                                                                                                                                                  |
|------|-----------------------------------------------------------------------------------------------------------------------------------------------------------------------------------------------------------------------------------------------------------------------------------------------------------|
| p. 1 | <b>Figure S1:</b> Fluorescence spectra of <b>1</b> ( $1.0 \times 10^{-5}$ mol/L) and upon addition of Cu <sup>2+</sup> , CH <sub>3</sub> COOOH in CH <sub>3</sub> CN with excitation at 340 nm.                                                                                                           |
| p. 2 | <b>Scheme S1:</b> The structure of three nitronyl nitroxides.<br><b>Figure S2:</b> UV-Vis absorption spectra of three nitronyl nitroxides ( $1.0 \times 10^{-5}$ mol/L) in CH <sub>3</sub> CN.<br><b>Table S1:</b> Ultraviolet Absorption Maximam of the three nitronyl nitroxides in CH <sub>3</sub> CN. |

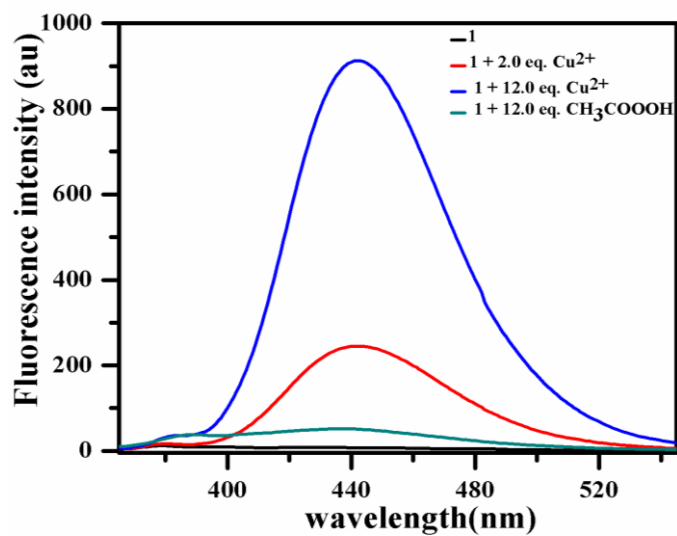

**Figure S1:** Fluorescence spectra of **1** ( $1.0 \times 10^{-5}$  mol/L) and upon addition of  $\text{Cu}^{2+}$ ,  $\text{CH}_3\text{COOOH}$  in  $\text{CH}_3\text{CN}$  with excitation at 340 nm.

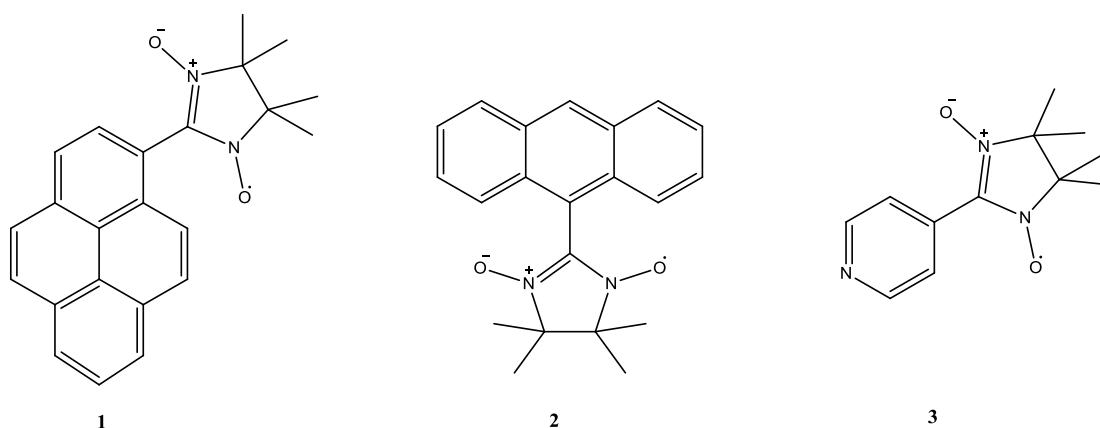

**Scheme S1:** The structure of three nitronyl nitroxides.

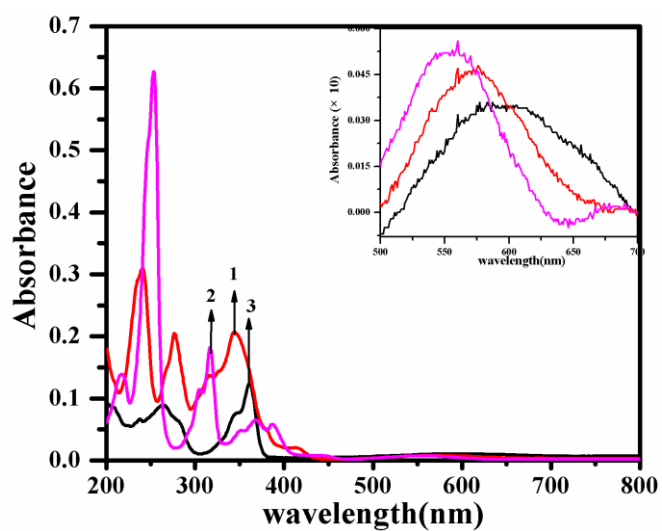

**Figure S2:** UV-Vis absorption spectra of three nitronyl nitroxides ( $1.0 \times 10^{-5}$  mol/L) in  $\text{CH}_3\text{CN}$

**Table S1:** Ultraviolet Absorption Maximam of the three nitronyl nitroxides in CH<sub>3</sub>CN.

| Compound | $\lambda_{\text{max, nm}} (\epsilon, \text{L} \cdot \text{mol}^{-1} \cdot \text{cm}^{-1})$ |            |            |          |
|----------|--------------------------------------------------------------------------------------------|------------|------------|----------|
| <b>1</b> | 241(30960)                                                                                 | 276(20500) | 345(20700) | 555(520) |
| <b>2</b> | 253(62720)                                                                                 |            | 317(18200) | 573(460) |
| <b>3</b> | 264(8980)                                                                                  |            | 361(12360) | 613(210) |
